# Supplementary material for: Integrated omics profiling of individual variations in intestinal damage to the soybean allergen in piglets
Source: Front Vet Sci. 2025 Jan 15;11:1521544. doi: 10.3389/fvets.2024.1521544 (PMC11774947; doi:10.3389/fvets.2024.1521544)
Supplement: Supplementary file 1 [file Table_1.xlsx]

## Sheet: S1
Table S1 Genes and specific primers used for qRT-PCR
Gene	Forward primer sequence (5’-3’)	Reverse primer sequence (5’-3’)
pig
GAPDH	CAAGTTCCACGGCACAGTCAAG	TCGCTCCTGGAAGATGGTGATG
PIR	AGTCGTGTTGCCATTGTCTCATC	GACCTGCTCTTCCTTCTTCTTCTG
SOWAHD	CACCGAGCCTGTCACTACCTG	GCTGTTGTTGTTGGCGTTGTTAC
TRAPPC2	AAGAAGGTGAGTGGTAGCAGGAG	TGCGTGTGGTGTGTGATTACTTAC
CFP	GGAGAATGGCTGAGTGAATGAGTG	TGAGGAAGTGGAGGTTGAAGGG
CCL19	TGGGAATCTGGTTCGAGCCTTTC	TCCTCTTCAGTCTCTTGATGATGCG
CCL19-siRNA1	GGGAGAUGCCAACGAUGCUTT	AGCAUCGUUGGCAUCUCCCTT
CCL19-siRNA1	GGAAUCUGGUUCGAGCCUUTT	AAGGCUCGAACCAGAUUCCTT
CCL19-siRNA1	GGAAAUCUGCUAAGAGCAATT	UUGCUCUUAGCAGAUUUCCTT
NC-siRNA	UUCUCCGAACGUGUCACGUTT	ACGUGACACGUUCGGAGAATT
β-actin	CATCCTGCGTCTGGACCTGG	TAATGTCACGCACGATTTCC
IL-6	AGGGAAATGTCGAGGCTGTGC	TGGTGGGGTTAGGGGTGGTG
IL-10	TCGGCCCAGTGAAGAGTTTC	GGAGTTCACGTGCTCCTTGA
TNF-α	GCATCGCCGTCTCCTACCAG	GGGCAGGTTGATCTCGGCAC
NF-κB	AAGAGCAGCGTGGTGGGCAGTG	CCGGAACGGTCTCCATCACAATC
mouse
β-actin	CTGGCACCACACCTCCTACA	AGTACTTGCGCACAGGAGGA
CFP	TGCTGTCTCAACGCTGCCTATG	CATAAGGACCATGCTGACCATTGTG
CFP-siRNA1	GAGAGACAUCAGGGUAGAATT	UUCUACCCUGAUGUCUCUCTT
CFP-siRNA2	GGACCAGCCUAUGAGCAUATT	UAUGCUCAUAGGCUGGUCCTT
CFP-siRNA3	GGAUAUUCGACACUGCUAUTT	AUAGCAGUGUCGAAUAUCCTT
TRAPPC2	CTTGTGGACGAAAATATGTGGCT	GACTTTCCTGTCGAATGCACT
TRAPPC2-siRNA1	CGGUGGACAAAUUUAAUGATT	UCAUUAAAUUUGUCCACCGTT
TRAPPC2-siRNA1	GCAGGGCAUAUGAGAUUUATT	UAAAUCUCAUAUGCCCUGCTT
TRAPPC2-siRNA1	GUGCAUUCGACAGGAAAGUTT	ACUUUCCUGUCGAAUGCACTT
NC-siRNA	UUCUCCGAACGUGUCACGUTT	ACGUGACACGUUCGGAGAATT
IL-1β	TTCAGGCAGGCAGTATCACTC	GAAGGTCCACGGGAAAGACAC
TNF-α	CCCTCACACTCAGATCATCTTCT	GCTACGACGTGGGCTACAG
IL-6	GACAACCACGGCCTTCCCTAC	AGCCTCCGACTTGTGAAGTGG
IL-10	TGGGTTGCCAAGCCTTATCGG	GCCGCATCCTGAGGGTCTTC

## Sheet: S2
Table S2 Erythema diameters in allergic and non-allergic groups
	0.9% NaCl	Soybean allergens
Allergic group	0.159±0.048mmb	7.514±1.063mma
Non-allergic group	0.161±0.030mm	0.721±0.111mm
The significant difference in erythema diameter between injected soybean allergens and 0.9% NaCl in individual piglets was indicated by a, b. P<0.05

## Sheet: S3
Table S3 Transcript information of candidate genes in the intestine
	baseMean_NA	baseMean_A	log2FoldChange	P
PIR	139.76	150.55	0.11	0.68
CFP	3719.69	4077.88	0.13	0.51
TRAPPC2	263.21	261.81	0.01	0.97
SOWAHD	253.32	193.49	0.39	0.175

## Sheet: S4
Table S4 Transcript information of candidate genes in the intestine
		Leu-Val	DL-phenylalanine	2-amino-1-phenylethanol	DL-tryptophan	Leucine	Cytidine
CD1.1	cor	0.85*	0.67*	0.699*	0.92*	0.75*	-0.83*
	P	0	0.03	0.03	0	0.01	0
CD1E	cor	0.65*	0.466	0.49	0.77*	0.51	-0.65*
	P	0.04	0.199	0.15	0.01	0.13	0.04
IL17REL	cor	0.58*	0.455	0.43	0.69*	0.49	-0.62*
	P	0.08	0.2	0.21	0.03	0.15	0.05
CAPN6	cor	0.54	0.47	0.45	0.67*	0.47	-0.66*
	P	0.11	0.18	0.19	0.04	0.18	0.04
*P < 0.05
